# Supplementary material for: In situ formation of metal–organic framework derived CuO polyhedrons on carbon cloth for highly sensitive non-enzymatic glucose sensing
Source: Royal Society of Chemistry journal article supplement (doi:10.1039/c9tb01166h), 2019-01-01
Supplement: c9tb01166h1.pdf [file c9tb01166h1.pdf]

# In-situ formation of metal-organic framework derived CuO polyhedrons on carbon cloth for highly sensitive non-enzymatic glucose sensing and supercapacitor applications

*Siyi Cheng<sup>a,b,c</sup>, Xiang Gao<sup>a,b</sup>, Steven Delacruz<sup>a,b</sup>, Chen Chen<sup>c</sup>, Zirong Tang<sup>c</sup>, Tielin Shi<sup>c</sup>,*

*Carlo Carraro<sup>a,b</sup>, Roya Maboudian<sup>a,b</sup> \**

<sup>a</sup> Berkeley Sensor & Actuator Center, University of California, Berkeley, California 94720,  
United States of America

<sup>b</sup> Department of Chemical and Biomolecular Engineering, University of California, Berkeley,  
California 94720, United States of America

<sup>c</sup> State Key Laboratory of Digital Manufacturing Equipment and Technology, Huazhong  
University of Science and Technology, Wuhan 430074, China

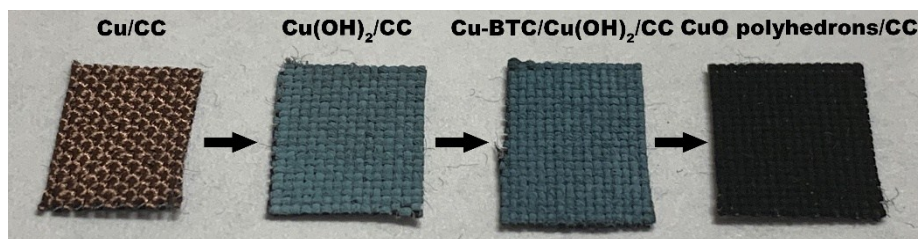

**Figure S1.** Photographs of Cu/CC, Cu(OH)<sub>2</sub> nanorods/CC, Cu-BTC/Cu(OH)<sub>2</sub> composites/CC, and CuO polyhedrons/CC.

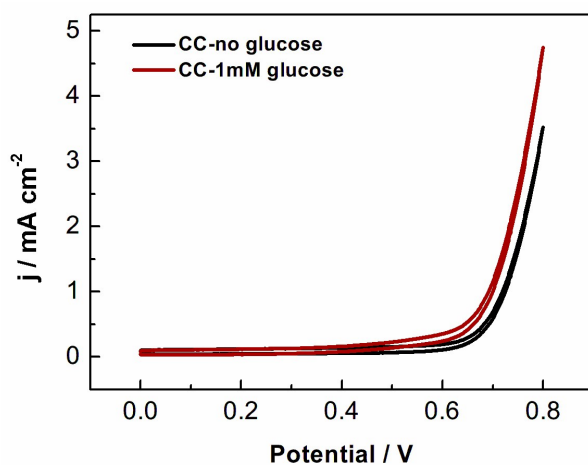

**Figure S2.** CVs of bare CC in the absence and presence of 1 mM glucose in 0.1 M NaOH solution with a scan rate of 50 mV s<sup>-1</sup>.

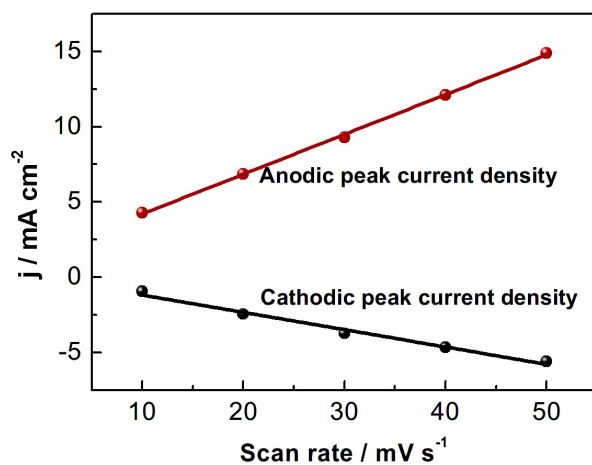

**Figure S3.** Calibration curves of peak current density vs. scan rate on CuO polyhedrons/CC electrode.

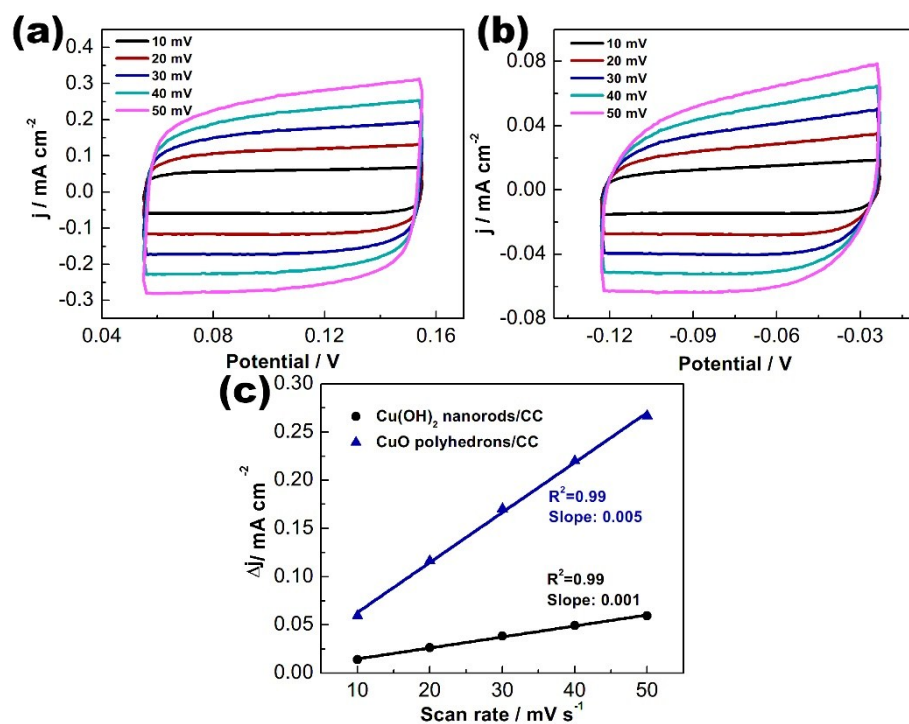

**Figure S4.** CV curves for (a) CuO polyhedrons/CC, and (b) Cu(OH)<sub>2</sub> nanorods/CC electrodes with different scan rates within  $\pm 0.05$  V of open circuit potential. (c) Capacitive currents at open circuit potential as a function of scan rate for CuO polyhedrons/CC and Cu(OH)<sub>2</sub> nanorods/CC electrodes ( $\Delta j = j_a - j_c$ ).

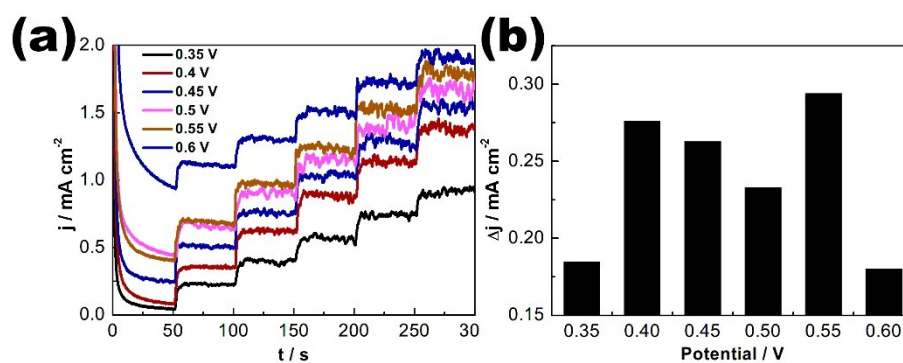

**Figure S5.** (a) Amperometric responses of the CuO polyhedrons/CC electrode upon successive injections of 50  $\mu$ M glucose into 0.1 M NaOH under different applied potentials. (b) Corresponding curve of current density response vs. applied potential on CuO polyhedrons/CC electrode.

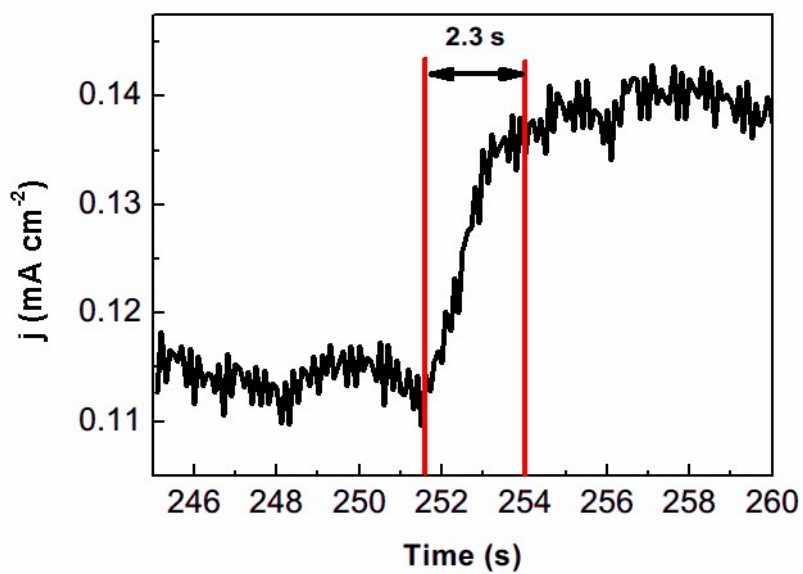

**Figure S6.** Enlarged view of the amperometric response with the addition of 5  $\mu\text{M}$  glucose.

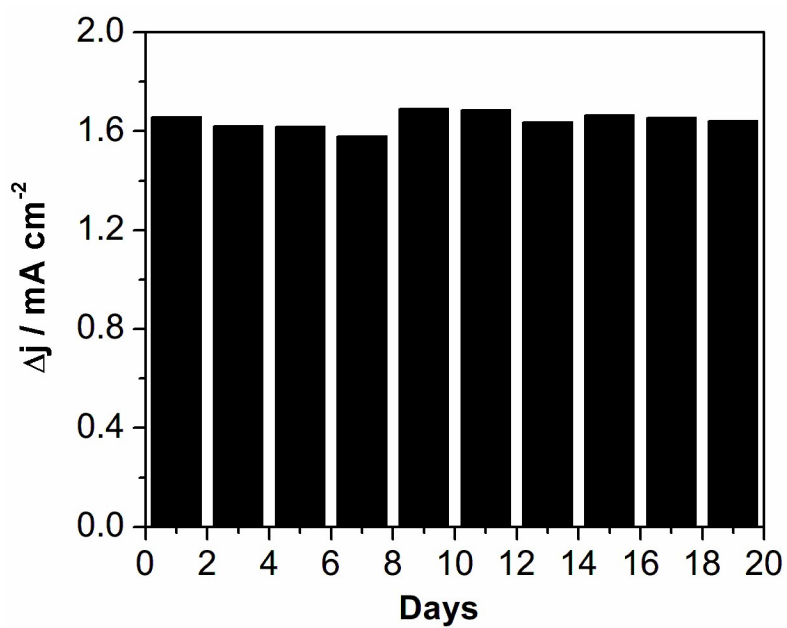

**Figure S7.** Long-term stability test of the CuO polyhedrons/CC electrode with the addition of 0.1 mM glucose over a 20-day period.
